# Supplementary material
Source: publisher figshare collection journal article supplement (https://karger.figshare.com/articles/dataset/_/4649866)
Supplement: Supplementary file 1 [file 1]

| Table S5: Example of annotation clustering from DAVID describing two enriched processes, Glutathione metabolism and transcriptional regulation. |                                                       |           |                    |            |                    |
|-------------------------------------------------------------------------------------------------------------------------------------------------|-------------------------------------------------------|-----------|--------------------|------------|--------------------|
| Category                                                                                                                                        | Term                                                  | Count     | PValue             | List Total | Fold Enrichment    |
| INTERPRO                                                                                                                                        | IPR003081:Glutathione S-transferase, Mu class         | 4         | 9.17E-05           | 275        | 40.58805195        |
| INTERPRO                                                                                                                                        | IPR004046:Glutathione S-transferase, C-terminal       | 5         | 0.001125184        | 275        | 10.76198347        |
| INTERPRO                                                                                                                                        | IPR004045:Glutathione S-transferase, N-terminal       | 5         | 0.001125184        | 275        | 10.76198347        |
| GOTERM_BP_DIRECT                                                                                                                                | GO:0018916~nitrobenzene metabolic process             | 3         | 0.001306243        | 249        | 50.02710843        |
| GOTERM_MF_DIRECT                                                                                                                                | GO:0004364~glutathione transferase activity           | 5         | 0.001350374        | 250        | 10.20451613        |
| GOTERM_MF_DIRECT                                                                                                                                | GO:0043295~glutathione binding                        | 4         | 0.001854759        | 250        | 15.817             |
| <b>KEGG_PATHWAY</b>                                                                                                                             | <b>mmu00480:Glutathione metabolism</b>                | <b>6</b>  | <b>0.002019562</b> | <b>128</b> | <b>6.569318182</b> |
| INTERPRO                                                                                                                                        | IPR010987:Glutathione S-transferase, C-terminal-like  | 5         | 0.003592444        | 275        | 7.892121212        |
| GOTERM_BP_DIRECT                                                                                                                                | GO:0042178~xenobiotic catabolic process               | 3         | 0.004438218        | 249        | 28.5869191         |
| GOTERM_BP_DIRECT                                                                                                                                | GO:0006749~glutathione metabolic process              | 5         | 0.004473115        | 249        | 7.411423472        |
| KEGG_PATHWAY                                                                                                                                    | mmu00980:Metabolism of xenobiotics by cytochrome P450 | 5         | 0.006215115        | 128        | 6.690972222        |
| KEGG_PATHWAY                                                                                                                                    | mmu00982:Drug metabolism - cytochrome P450            | 5         | 0.007815539        | 128        | 6.272786458        |
| UP_SEQ_FEATURE                                                                                                                                  | domain:GST N-terminal                                 | 4         | 0.008489343        | 255        | 9.420130719        |
| UP_SEQ_FEATURE                                                                                                                                  | domain:GST C-terminal                                 | 4         | 0.019907987        | 255        | 6.892778575        |
| KEGG_PATHWAY                                                                                                                                    | mmu05204:Chemical carcinogenesis                      | 5         | 0.06493113         | 128        | 3.272758152        |
| INTERPRO                                                                                                                                        | IPR012336:Thioredoxin-like fold                       | 5         | 0.122225117        | 275        | 2.630707071        |
| GOTERM_BP_DIRECT                                                                                                                                | GO:0008152~metabolic process                          | 10        | 0.291498366        | 249        | 1.378157257        |
|                                                                                                                                                 |                                                       |           |                    |            |                    |
| Annotation Cluster 2                                                                                                                            | Enrichment Score: 2.202438644893318                   |           |                    |            |                    |
| Category                                                                                                                                        | Term                                                  | Count     | PValue             | List Total | Fold Enrichment    |
| UP_KEYWORDS                                                                                                                                     | Nucleus                                               | 86        | 2.44E-04           | 281        | 1.432714499        |
| UP_KEYWORDS                                                                                                                                     | Transcription                                         | 42        | 8.85E-04           | 281        | 1.694999913        |
| <b>UP_KEYWORDS</b>                                                                                                                              | <b>Transcription regulation</b>                       | <b>39</b> | <b>0.002932861</b> | <b>281</b> | <b>1.626656414</b> |
| GOTERM_BP_DIRECT                                                                                                                                | GO:0006351~transcription, DNA-templated               | 40        | 0.012933994        | 249        | 1.466801787        |
| UP_KEYWORDS                                                                                                                                     | DNA-binding                                           | 33        | 0.014036324        | 281        | 1.541673065        |
| GOTERM_MF_DIRECT                                                                                                                                | GO:0003677~DNA binding                                | 37        | 0.041367714        | 250        | 1.372971261        |
| GOTERM_BP_DIRECT                                                                                                                                | GO:0006355~regulation of transcription, DNA-templated | 39        | 0.080401663        | 249        | 1.285281442        |
