# Supplementary material
Source: publisher figshare collection journal article supplement (https://karger.figshare.com/articles/dataset/_/4649866)
Supplement: Supplementary file 2 [file 1]

**Table S2: 142 genes annotated as expressed in the “testis” ranked 1 or 2 (publication quality) in the Eurexpress database.**

| Gene     | Chromosome | Gene Name                                                                                      |
|----------|------------|------------------------------------------------------------------------------------------------|
| Acsbg1   | 9          | Acyl-Coa Synthetase Bubblegum Family Member 1                                                  |
| Adamts16 | 13         | A Disintegrin-Like And Metallopeptidase (Reprolysin Type) With Thrombospondin Type 1 Motif, 16 |
| Adamts2  | 11         | A Disintegrin-Like And Metallopeptidase (Reprolysin Type) With Thrombospondin Type 1 Motif, 2  |
| Adh1     | 3          | Alcohol Dehydrogenase 1 (Class I)                                                              |
| Ap3b2    | 7          | Adaptor-Related Protein Complex 3, Beta 2 Subunit                                              |
| Apc      | 18         | Adenomatosis Polyposis Coli                                                                    |
| Apex1    | 14         | Apurinic/Apyrimidinic Endonuclease 1                                                           |
| Apln     | X          | Apelin                                                                                         |
| Arl6ip2  | 17         | Atlastin Gtpase 2                                                                              |
| Atp6v1e1 | 6          | Atpase, H <sup>+</sup> Transporting, Lysosomal V1 Subunit E1                                   |
| Atp8b2   | 3          | Atpase, Class I, Type 8b, Member 2                                                             |
| Bex2     | X          | Brain Expressed X-Linked 2                                                                     |
| Bub1     | 2          | Bub1, Mitotic Checkpoint Serine/Threonine Kinase                                               |
| Cd34     | 1          | Cd34 Antigen                                                                                   |
| Cdca7l   | 12         | Cell Division Cycle Associated 7 Like                                                          |
| Cdk5rap1 | 2          | Cdk5 Regulatory Subunit Associated Protein 1                                                   |
| Clca1    | 3          | Chloride Channel Accessory 1                                                                   |
| Clca4    | 3          | Chloride Channel Accessory 4a/4b                                                               |
| Clcn2    | 16         | Chloride Channel, Voltage-Sensitive 2                                                          |
| Col9a3   | 2          | Collagen, Type Ix, Alpha 3                                                                     |
| Copb2    | 9          | Coatomer Protein Complex, Subunit Beta 2 (Beta Prime)                                          |
| Ctnna2   | 6          | Catenin (Cadherin Associated Protein), Alpha 2                                                 |
| Cxadr    | 16         | Coxsackie Virus And Adenovirus Receptor                                                        |
| Cxcl12   | 6          | Chemokine (C-X-C Motif) Ligand 12                                                              |
| Cyp11a1  | 9          | Cytochrome P450, Family 11, Subfamily A, Polypeptide 1                                         |
| Cyp51    | 5          | Cytochrome P450, Family 51                                                                     |
| Rnf213   | 11         | Ring Finger Protein 213 (Rnf213)                                                               |
| Ifi27    | 12         | Interferon, Alpha-Inducible Protein 27 (Ifi27 )                                                |
| Spice1   | 16         | Spindle And Centriole Associated Protein 1 (Spice1 )                                           |
| Daam2    | 17         | Dishevelled Associated Activator Of Morphogenesis 2                                            |
| Dppa3    | 6          | Developmental Pluripotency-Associated 3                                                        |
| Dsp      | 13         | Desmoplakin                                                                                    |
| Elavl2   | 4          | Elav (Embryonic Lethal, Abnormal Vision, Drosophila)-Like 2 (Hu Antigen B)                     |
| Ets1     | 9          | E26 Avian Leukemia Oncogene 1, 5' Domain                                                       |
| Etv5     | 16         | Ets Variant 5                                                                                  |
| Fads1    | 19         | Fatty Acid Desaturase 1                                                                        |
| Fthfd    | 6          | Aldehyde Dehydrogenase 1 Family, Member L1                                                     |
| Gas6     | 8          | Growth Arrest Specific 6                                                                       |

|          |    |                                                                              |
|----------|----|------------------------------------------------------------------------------|
| Gem      | 4  | Gtp Binding Protein (Gene Overexpressed In Skeletal Muscle)                  |
| Gjb2     | 14 | Gap Junction Protein, Beta 2                                                 |
| Gnl3     | 14 | Guanine Nucleotide Binding Protein-Like 3 (Nucleolar)                        |
| Gpc4     | X  | Glypican 4                                                                   |
| Adgrg1   | 8  | Adhesion G Protein-Coupled Receptor G1 (Adgrg1 )                             |
| Gramd1b  | 9  | Gram Domain Containing 1b                                                    |
| Grrp     | 4  | Glycine/Arginine Rich Protein 1                                              |
| Gsta4    | 9  | Glutathione S-Transferase, Alpha 4                                           |
| Gstm1    | 3  | Glutathione S-Transferase, Mu 1                                              |
| Gstm4    | 3  | Glutathione S-Transferase, Mu 4                                              |
| Gstm7    | 3  | Glutathione S-Transferase, Mu 7                                              |
| Gtf2b    | 3  | General Transcription Factor Iib                                             |
| Gtf2e2   | 8  | General Transcription Factor Ii E, Polypeptide 2 (Beta Subunit)              |
| Gtlf3b   | 11 | N-Acetyltransferase Domain Containing 1                                      |
| Gucy1a3  | 3  | Guanylate Cyclase 1, Soluble, Alpha 3                                        |
| Hat1     | 2  | Histone Aminotransferase 1                                                   |
| Hmg20a   | 9  | High Mobility Group 20a                                                      |
| Hmga1    | 17 | High Mobility Group At-Hook 1                                                |
| Hoxd9    | 2  | Homeobox D9                                                                  |
| Hs6st1   | 1  | Heparan Sulfate 6-O-Sulfotransferase 1                                       |
| Hsd17b7  | 1  | Hydroxysteroid (17-Beta) Dehydrogenase 7                                     |
| Hsd3b3   | 3  | Hydroxy-Delta-5-Steroid Dehydrogenase, 3 Beta- And Steroid Delta-Isomerase 3 |
| Hsp90aa1 | 12 | Heat Shock Protein 90, Alpha (Cytosolic), Class A Member 1                   |
| Hspa1a   | 17 | Heat Shock Protein 1a                                                        |
| Idi1     | 13 | Isopentenyl-Diphosphate Delta Isomerase                                      |
| Ifitm7   | 16 | Interferon Induced Transmembrane Protein 7                                   |
| Irf1     | 11 | Interferon Regulatory Factor 1                                               |
| Itga9    | 9  | Integrin Alpha 9                                                             |
| Kcnt1    | 2  | Potassium Channel, Subfamily T, Member 1                                     |
| L3mbtl   | 2  | L(3)Mbt-Like (Drosophila)                                                    |
| Trank1   | 9  | Tetratricopeptide Repeat And Ankyrin Repeat Containing 1 (Trank1 )           |
| Liph     | 16 | Lipase, Member H                                                             |
| Lsr      | 7  | Lipolysis Stimulated Lipoprotein Receptor (Lsr)                              |
| Melk     | 4  | Maternal Embryonic Leucine Zipper Kinase                                     |
| Mmp8     | 9  | Matrix Metalloproteinase 8                                                   |
| Me1      | 9  | Malic Enzyme 1, NADP(+)-Dependent, Cytosolic (Me1)                           |
| Mphosph6 | 8  | M Phase Phosphoprotein 6                                                     |
| Mrpl23   | 7  | Mitochondrial Ribosomal Protein L23                                          |
| Mybbp1a  | 11 | Myb Binding Protein (P160) 1a                                                |
| Npr1     | 3  | Natriuretic Peptide Receptor 1                                               |
| Nrg1     | 8  | Neuregulin 1                                                                 |
| Nts      | 10 | Neurotensin                                                                  |
| Nupl1    | 14 | Nucleoporin Like 1                                                           |

|           |    |                                                                                              |
|-----------|----|----------------------------------------------------------------------------------------------|
| Osbp10    | 9  | Oxysterol Binding Protein-Like 10                                                            |
| Slc45a3   | 1  | Solute Carrier Family 45, Member 3 (Slc45a3)                                                 |
| Pcsk6     | 7  | Proprotein Convertase Subtilisin/Kexin Type 6                                                |
| Pdzd4     | X  | Pdz Domain Containing 4                                                                      |
| Pgpep1    | 8  | Pyroglutamyl-Peptidase I                                                                     |
| Pla2g5    | 4  | Phospholipase A2, Group V                                                                    |
| Plekha1   | 7  | Pleckstrin Homology Domain Containing, Family A (Phosphoinositide Binding Specific) Member 1 |
| Polr3f    | 2  | Polymerase (Rna) Iii (Dna Directed) Polypeptide F                                            |
| Por       | 5  | P450 (Cytochrome) Oxidoreductase                                                             |
| Ppt1      | 4  | Palmitoyl-Protein Thioesterase 1                                                             |
| Prkar2b   | 12 | Protein Kinase, Camp Dependent Regulatory, Type Ii Beta                                      |
| Prlr      | 15 | Prolactin Receptor                                                                           |
| Psmal     | 7  | Proteasome (Prosome, Macropain) Subunit, Alpha Type 1                                        |
| Rad52b    | 11 | Rad52 Motif 1                                                                                |
| Rcc2      | 4  | Regulator Of Chromosome Condensation 2                                                       |
| Rcl1      | 19 | Rna Terminal Phosphate Cyclase-Like 1                                                        |
| Ren1      | 1  | Renin 1 Structural                                                                           |
| Rgs11     | 17 | Regulator Of G-Protein Signaling 11                                                          |
| Rhpn1     | 15 | Rhophilin, Rho Gtpase Binding Protein 1                                                      |
| Rnf138    | 18 | Ring Finger Protein 138                                                                      |
| Msmo1     | 8  | Methylsterol Monooxygenase 1 (Msmo1 )                                                        |
| Scarb1    | 5  | Scavenger Receptor Class B, Member 1                                                         |
| Schip1    | 3  | Schwannomin Interacting Protein 1                                                            |
| Scrn2     | 11 | Secernin 2                                                                                   |
| Sct       | 7  | Secretin                                                                                     |
| Serpinb6a | 13 | Serine (Or Cysteine) Peptidase Inhibitor, Clade B, Member 6a                                 |
| Slc20a1   | 2  | Solute Carrier Family 20, Member 1                                                           |
| Slc25a31  | 3  | Solute Carrier Family 25 (Mitochondrial Carrier; Adenine Nucleotide Translocator), Member 31 |
| Slc29a1   | 17 | Solute Carrier Family 29 (Nucleoside Transporters), Member 1                                 |
| Slc38a1   | 15 | Solute Carrier Family 38, Member 1                                                           |
| Slc7a5    | 8  | Solute Carrier Family 7 (Cationic Amino Acid Transporter, Y+ System), Member 5               |
| Smoc1     | 12 | Sparc Related Modular Calcium Binding 1                                                      |
| Snrpn     | 7  | Small Nuclear Ribonucleoprotein N                                                            |
| Sostdc1   | 12 | Sclerostin Domain Containing 1                                                               |
| Sox2      | 3  | Sry (Sex Determining Region Y)-Box 2                                                         |
| Stc1      | 14 | Stanniocalcin 1                                                                              |
| Stc2      | 11 | Stanniocalcin 2                                                                              |
| Stxbp2    | 8  | Syntaxin Binding Protein 2                                                                   |
| Tacr3     | 3  | Tachykinin Receptor 3                                                                        |
| Epcam     | 17 | Epithelial Cell Adhesion Molecule (Epcam)                                                    |
| Tbc1d8    | 1  | Tbc1 Domain Family, Member 8                                                                 |
| Tcf21     | 10 | Transcription Factor 21                                                                      |

|         |    |                                                        |
|---------|----|--------------------------------------------------------|
| Tcl1    | 12 | T Cell Lymphoma Breakpoint 1                           |
| Serinc3 | 2  | Serine Incorporator 3 (Serinc3 )                       |
| Tesc    | 5  | Tescalcin                                              |
| Tex2    | 11 | Testis Expressed Gene 2                                |
| Tle6    | 10 | Transducin-Like Enhancer Of Split 6                    |
| Tmcc3   | 10 | Transmembrane And Coiled Coil Domains 3                |
| Tmem35  | X  | Transmembrane Protein 35a                              |
| Tpd52   | 3  | Tumor Protein D52                                      |
| Trip13  | 13 | Thyroid Hormone Receptor Interactor 13                 |
| Ttrap   | 5  | Transformation/Transcription Domain-Associated Protein |
| Tyro3   | 2  | Tyro3 Protein Tyrosine Kinase 3                        |
| Ube2t   | 1  | Ubiquitin-Conjugating Enzyme E2t                       |
| Uchl1   | 5  | Ubiquitin Carboxy-Terminal Hydrolase L1                |
| Yars2   | 16 | Tyrosyl-Trna Synthetase 2 (Mitochondrial)              |
| Zdhhc24 | 19 | Zinc Finger, Dhhc Domain Containing 24                 |
| Zfp451  | 1  | Zinc Finger Protein 451                                |
| Zfp516  | 18 | Zinc Finger Protein 516                                |
