# Supplementary material
Source: publisher figshare collection journal article supplement (https://karger.figshare.com/articles/dataset/_/4649866)
Supplement: Supplementary file 3 [file 1]

**Table S3:**  
**List of genes represented in both the list of Eurexpress testis annotated genes and gene lists from Jameson et al., 2012 microarray**

| <b>Supporting (Sertoli) cells</b> | <b>Leydig cells</b> | <b>Mixed interstitial cells</b> | <b>Germ cells</b> | <b>Endothelial cells</b> |
|-----------------------------------|---------------------|---------------------------------|-------------------|--------------------------|
| <b>Gene name</b>                  | <b>Gene name</b>    | <b>Gene name</b>                | <b>Gene name</b>  | <b>Gene name</b>         |
| Adamts16                          | Cyp11a1             | Cla1                            | Abl2              | Acsbg1                   |
| Amh                               | Fads1               | Cxcl12                          | Ap3b2             | Nr4a1                    |
| Atp8b2                            | Gramd1b             | Gucy1b3                         | Bub1b             |                          |
| Bex2                              | Hsd17b7             | Itga9                           | Cdk5rap1          |                          |
| Camkk2                            | Prkar2b             | Itgb8                           | Ddx41             |                          |
| Col9a3                            | Prlr                | Nrg1                            | Dppa3             |                          |
| Ctnna2                            | Ren1                | Sostdc1                         | Elavl2            |                          |
| Cxadr                             | Scarb1              | Stc1                            | Epcam             |                          |
| Dsp                               | Sct                 | Tacr3                           | Gnl3              |                          |
| Eps8                              | Star                |                                 | Gtf3c3            |                          |
| Fzd3                              | Stc1                |                                 | Irf1              |                          |
| Gjb2                              |                     |                                 | Liph              |                          |
| Gpr37                             |                     |                                 | Mybbp1a           |                          |
| Gstm7                             |                     |                                 | Nsmaf             |                          |
| Lsr                               |                     |                                 | Pip4k2a           |                          |
| Mybl1                             |                     |                                 | Pou6f1            |                          |
| Nfe2                              |                     |                                 | Rcc2              |                          |
| Npr1                              |                     |                                 | Rcl1              |                          |
| Pdgfa                             |                     |                                 | Rdm1              |                          |
| Pgpep1                            |                     |                                 | Srfbp1            |                          |
| Pla2g5                            |                     |                                 | Taf7              |                          |
| Ppt1                              |                     |                                 | Tet1              |                          |
| Schip1                            |                     |                                 | Trip13            |                          |
| Sgk3                              |                     |                                 | Uchl1             |                          |
| Sil1                              |                     |                                 | Wdr31             |                          |
| Slc20a1                           |                     |                                 |                   |                          |
| Slc38a1                           |                     |                                 |                   |                          |
| Slc7a5                            |                     |                                 |                   |                          |
| Stc2                              |                     |                                 |                   |                          |
| Tbc1d8                            |                     |                                 |                   |                          |
| Tesc                              |                     |                                 |                   |                          |
| Tmcc3                             |                     |                                 |                   |                          |
| Tpd52                             |                     |                                 |                   |                          |
| Trank1                            |                     |                                 |                   |                          |
| Tyro3                             |                     |                                 |                   |                          |
