# Supplementary material
Source: publisher figshare collection journal article supplement (https://karger.figshare.com/articles/dataset/_/4649866)
Supplement: Supplementary file 4 [file 1]

**Table S1: Full list of 298 entries under the annotation of expressed in the “testis” from the Eurexpress database**

| <b>HUGO approved gene name</b> | <b>Non-HUGO symbols listed in Eurexpress</b> | <b>HUGO approved name</b>                                          |
|--------------------------------|----------------------------------------------|--------------------------------------------------------------------|
| 1700011H14Rik                  | 1700011H14Rik                                | *                                                                  |
| Aatf                           |                                              | Apoptosis Antagonizing Transcription Factor                        |
| Abhd17c                        | 2210412D01Rik                                | Abhydrolase Domain Containing 17C                                  |
| Abl2                           |                                              | ABL Proto-Oncogene 2, Non-Receptor Tyrosine Kinase                 |
| Abtb2                          |                                              | Ankyrin Repeat And BTB (POZ) Domain Containing 2                   |
| Acsbg1                         |                                              | Acyl-Coa Synthetase Bubblegum Family Member 1                      |
| Adamts16                       |                                              | ADAM Metallopeptidase With Thrombospondin Type 1 Motif 16          |
| Adamts2                        |                                              | ADAM Metallopeptidase With Thrombospondin Type 1 Motif 2           |
| Adh1                           |                                              | Alcohol Dehydrogenase 1A (Class I), Alpha Polypeptide              |
| Ajap1                          |                                              | Adherens Junctions Associated Protein 1                            |
| Akr1cl                         | 4921521F21Rik                                | Aldo-Keto Reductase Family 1, Member C-Like                        |
| Amh                            |                                              | Anti-Mullerian Hormone                                             |
| Anxa11                         |                                              | Annexin A11                                                        |
| Anxa4                          |                                              | Annexin A4                                                         |
| Ap3b2                          |                                              | Adaptor Related Protein Complex 3 Beta 2 Subunit                   |
| Apc                            |                                              | APC, WNT Signaling Pathway Regulator                               |
| Apex1                          |                                              | Apurinic/Apyrimidinic Endodeoxyribonuclease 1                      |
| Apln                           |                                              | Apelin                                                             |
| Arl6ip2                        |                                              | Atlastin Gtpase 2                                                  |
| Art5                           |                                              | ADP-Ribosyltransferase 5                                           |
| Ash2l                          |                                              | ASH2 Like Histone Lysine Methyltransferase Complex Subunit         |
| Aspa                           |                                              | Aspartoacylase                                                     |
| Atp1b1                         |                                              | Atpase Na <sup>+</sup> /K <sup>+</sup> Transporting Subunit Beta 1 |
| Atp6v1b1                       |                                              | Atpase H <sup>+</sup> Transporting V1 Subunit B1                   |
| Atp6v1e1                       |                                              | Atpase H <sup>+</sup> Transporting V1 Subunit E1                   |
| Atp8b2                         |                                              | Atpase Phospholipid Transporting 8B2                               |
| Bbx                            |                                              | BBX, HMG-Box Containing                                            |
| BC034902                       | BC034902                                     | *                                                                  |
| Bex2                           |                                              | Brain Expressed X-Linked 2                                         |
| Bra1                           |                                              | BRCA1, DNA Repair Associated                                       |
| Btf3                           |                                              | Basic Transcription Factor 3                                       |
| Bub1                           |                                              | BUB1 Mitotic Checkpoint Serine/Threonine Kinase                    |
| Bub1b                          |                                              | BUB1 Mitotic Checkpoint Serine/Threonine Kinase B                  |
| Camkk2                         |                                              | Calcium/Calmodulin Dependent Protein Kinase Kinase 2               |
| Casp6                          |                                              | Caspase 6                                                          |
| Cd34                           |                                              | CD34 Molecule                                                      |
| Cdca7l                         |                                              | Cell Division Cycle Associated 7 Like                              |
| Cdk5rap1                       |                                              | CDK5 Regulatory Subunit Associated Protein 1                       |
| Cenpj                          |                                              | Centromere Protein J                                               |
| Cenpo                          | 2810429O05Rik                                | Centromere Protein O                                               |

|               |               |                                                                                 |
|---------------|---------------|---------------------------------------------------------------------------------|
| Cep68         | BC027174      | Centrosomal Protein 68                                                          |
| Clca1         |               | Chloride Channel Accessory 1                                                    |
| Clca4         |               | Chloride Channel Accessory 4                                                    |
| Clcn2         |               | Chloride Voltage-Gated Channel 2                                                |
| Cldn13        |               | Claudin 13                                                                      |
| Clmn          |               | Calmin                                                                          |
| Cobl1         |               | Cordon-Bleu WH2 Repeat Protein Like 1                                           |
| Col4a1        |               | Collagen Type IV Alpha 1 Chain                                                  |
| Col9a3        |               | Collagen Type IX Alpha 3 Chain                                                  |
| Copb2         |               | Coatomer Protein Complex Subunit Beta 2                                         |
| Csrp1         |               | Cysteine And Glycine Rich Protein 1                                             |
| Ctnna2        |               | Catenin Alpha 2                                                                 |
| Cx3cl1        |               | C-X3-C Motif Chemokine Ligand 1                                                 |
| Cxadr         |               | Coxsackie Virus And Adenovirus Receptor                                         |
| Cxcl12        |               | C-X-C Motif Chemokine Ligand 12                                                 |
| Cxxc6         |               | Tet Methylcytosine Dioxygenase 1                                                |
| Cyp11a1       |               | Cytochrome P450 Family 11 Subfamily A Member 1                                  |
| Cyp51         |               | Cytochrome P450 Family 51 Subfamily A Member 1                                  |
| D930030O05Rik | D930030O05Rik | *                                                                               |
| Daam2         |               | Dishevelled Associated Activator Of Morphogenesis 2                             |
| Dcun1d5       | 4833420K19Rik | DCN1, Defective In Cullin Neddylation 1, Domain Containing 5                    |
| Ddx41         |               | DEAD-Box Helicase 41                                                            |
| Ddx48         |               | Eukaryotic Translation Initiation Factor 4A3                                    |
| Dnmt3b        |               | DNA Methyltransferase 3 Beta                                                    |
| Dppa3         |               | Developmental Pluripotency Associated 3                                         |
| Dppa5         |               | Developmental Pluripotency Associated 5                                         |
| Drg1          |               | Developmentally Regulated GTP Binding Protein 1                                 |
| Dsp           |               | Desmoplakin                                                                     |
| E430025E21Rik |               | *                                                                               |
| Eif2b1        |               | Eukaryotic Translation Initiation Factor 2B Subunit Alpha                       |
| Eif2s3y       |               | Eukaryotic Translation Initiation Factor 2, Subunit 3, Structural Gene Y-Linked |
| Elavl2        |               | ELAV Like RNA Binding Protein 2                                                 |
| Eps8          |               | Epidermal Growth Factor Receptor Pathway Substrate 8                            |
| Eps8l2        |               | EPS8 Like 2                                                                     |
| Ets1          |               | ETS Proto-Oncogene 1, Transcription Factor                                      |
| Etv5          |               | ETS Variant 5                                                                   |
| Fads1         |               | Fatty Acid Desaturase 1                                                         |
| Fam214a       | BC031353      | Family With Sequence Similarity 214, Member A                                   |
| Fasn          |               | Fatty Acid Synthase                                                             |
| Fastkd2       | 2810421I24Rik | FAST Kinase Domains 2                                                           |
| Fbrsl1        | 2410025L10Rik | Fibrosin-Like 1                                                                 |
| Fiz1          |               | FLT3 Interacting Zinc Finger 1                                                  |
| Fosl2         |               | FOS Like 2, AP-1 Transcription Factor Subunit                                   |

|          |               |                                                                              |
|----------|---------------|------------------------------------------------------------------------------|
| Foxn2    |               | Forkhead Box N2                                                              |
| Frzb     |               | Frizzled-Related Protein                                                     |
| Fthfd    |               | Aldehyde Dehydrogenase 1 Family Member L1                                    |
| Fzd3     |               | Frizzled Class Receptor 3                                                    |
| Gas6     |               | Growth Arrest Specific 6                                                     |
| Gem      |               | GTP Binding Protein Overexpressed In Skeletal Muscle                         |
| Gjb2     |               | Gap Junction Protein Beta 2                                                  |
| Gmn      |               | Geminin, DNA Replication Inhibitor                                           |
| Gnl3     |               | G Protein Nucleolar 3                                                        |
| Gpc4     |               | Glypican 4                                                                   |
| Gpr37    |               | G Protein-Coupled Receptor 37                                                |
| Gpr56    |               | Adhesion G Protein-Coupled Receptor G1                                       |
| Gprk5    |               | G Protein-Coupled Receptor Kinase 5                                          |
| Gramd1b  |               | GRAM Domain Containing 1B                                                    |
| Grrp1    |               | Family With Sequence Similarity 110 Member D                                 |
| Gsta4    |               | Glutathione S-Transferase Alpha 4                                            |
| Gstm1    |               | Glutathione S-Transferase Mu 1                                               |
| Gstm4    |               | Glutathione S-Transferase Mu 4                                               |
| Gstm5    |               | Glutathione S-Transferase Mu 5                                               |
| Gstm7    |               | Glutathione S-Transferase, Mu 7                                              |
| Gtf2b    |               | General Transcription Factor IIB                                             |
| Gtf2e2   |               | General Transcription Factor IIE Subunit 2                                   |
| Gtf3c3   |               | General Transcription Factor IIIC Subunit 3                                  |
| Gucy1a3  |               | Guanylate Cyclase 1 Soluble Subunit Alpha                                    |
| Gucy1b3  |               | Guanylate Cyclase 1 Soluble Subunit Beta                                     |
| Hadhsc   |               | Hydroxyacyl-CoA Dehydrogenase                                                |
| Hat1     |               | Histone Acetyltransferase 1                                                  |
| Heatr1   | B130016L12Rik | HEAT Repeat Containing 1                                                     |
| Hmg20a   |               | High Mobility Group 20A                                                      |
| Hmga1    |               | High Mobility Group AT-Hook 1                                                |
| Hoxd9    |               | Homeobox D9                                                                  |
| Hs6st1   |               | Heparan Sulfate 6-O-Sulfotransferase 1                                       |
| Hsd17b7  |               | Hydroxysteroid 17-Beta Dehydrogenase 7                                       |
| Hsd17b7  |               | Hydroxysteroid 17-Beta Dehydrogenase 7 Pseudogene 2                          |
| Hsd3b3   |               | Hydroxy-Delta-5-Steroid Dehydrogenase, 3 Beta- And Steroid Delta-Isomerase 3 |
| Hsp90aa1 |               | Heat Shock Protein 90 Alpha Family Class A Member 1                          |
| Hspa1a   |               | Heat Shock Protein Family A (Hsp70) Member 1A                                |
| Hspa2    |               | Heat Shock Protein Family A (Hsp70) Member 2                                 |
| Iah1     | 4833421E05Rik | Isoamyl Acetate-Hydrolyzing Esterase 1 Homolog                               |
| Idh1     |               | Isocitrate Dehydrogenase (NADP(+)) 1, Cytosolic                              |
| Idi1     |               | Isopentenyl-Diphosphate Delta Isomerase 1                                    |
| Ier5l    |               | Immediate Early Response 5 Like                                              |
| Ifi27    | D12Ert647e    | Interferon, Alpha-Inducible Protein 27                                       |

|                 |          |                                                                     |
|-----------------|----------|---------------------------------------------------------------------|
| Ifitm7          |          |                                                                     |
| Immt            |          | Inner Membrane Mitochondrial Protein                                |
| Irf1            |          | Interferon Regulatory Factor 1                                      |
| Itga9           |          | Integrin Subunit Alpha 9                                            |
| Itgb8           |          | Integrin Subunit Beta 8                                             |
| Kcnt1           |          | Potassium Sodium-Activated Channel Subfamily T Member 1             |
| Kctd14          |          | Potassium Channel Tetramerization Domain Containing 14              |
| Kif2c           |          | Kinesin Family Member 2C                                            |
| Kirrel2         |          | Kin Of IRRE Like 2 (Drosophila)                                     |
| L3mbtl          |          | L(3)Mbt-Like 1 (Drosophila)                                         |
| Lba1            |          | Tetratricopeptide Repeat And Ankyrin Repeat Containing 1            |
| Lin28           |          | Lin-28 Homolog A                                                    |
| Liph            |          | Lipase H                                                            |
| Lisch7          |          | Lipolysis Stimulated Lipoprotein Receptor                           |
| LOC620538       |          | *                                                                   |
| LOC673219       |          | *                                                                   |
| Lyar            |          | Ly1 Antibody Reactive                                               |
| Mafg            |          | MAF Bzip Transcription Factor G                                     |
| Mcm8            |          | Minichromosome Maintenance 8 Homologous Recombination Repair Factor |
| Melk            |          | Maternal Embryonic Leucine Zipper Kinase                            |
| Mettl25         | BC067068 | Methyltransferase Like 25                                           |
| Mmp8            |          | Matrix Metalloproteinase 8                                          |
| mmu-miR-291a-5p |          | ^                                                                   |
| mmu-miR-291b-5p |          | ^                                                                   |
| mmu-miR-696     |          | ^                                                                   |
| Mod1            |          | Chromobox 1                                                         |
| Mphosph6        |          | M-Phase Phosphoprotein 6                                            |
| Mpp3            |          | Membrane Palmitoylated Protein 3                                    |
| Mrpl23          |          | Mitochondrial Ribosomal Protein L23                                 |
| Mrpl24          |          | Mitochondrial Ribosomal Protein L24                                 |
| Mrps27          |          | Mitochondrial Ribosomal Protein S27                                 |
| Mtif2           |          | Mitochondrial Translational Initiation Factor 2                     |
| Mybbp1a         |          | MYB Binding Protein 1a                                              |
| Mybl1           |          | MYB Proto-Oncogene Like 1                                           |
| Nat10           |          | N-Acetyltransferase 10                                              |
| Ndufa9          |          | NADH:Ubiquinone Oxidoreductase Subunit A9                           |
| Ndufab1         |          | NADH:Ubiquinone Oxidoreductase Subunit AB1                          |
| Ndufs1          |          | NADH:Ubiquinone Oxidoreductase Core Subunit S1                      |
| Ndufs3          |          | NADH:Ubiquinone Oxidoreductase Core Subunit S3                      |
| Ndufv1          |          | NADH:Ubiquinone Oxidoreductase Core Subunit V1                      |
| Nepro           | BC027231 | Nucleolus And Neural Progenitor Protein                             |
| Nfe2            |          | Nuclear Factor, Erythroid 2                                         |
| Npr1            |          | Natriuretic Peptide Receptor 1                                      |

|         |               |                                                                              |
|---------|---------------|------------------------------------------------------------------------------|
| Nr4a1   |               | Nuclear Receptor Subfamily 4 Group A Member 1                                |
| Nrg1    |               | Neuregulin 1                                                                 |
| Nsmaf   |               | Neutral Sphingomyelinase Activation Associated Factor                        |
| Nts     |               | Neurotensin                                                                  |
| Nup11   |               | Nucleoporin 58                                                               |
| Nutf2   |               | Nuclear Transport Factor 2                                                   |
| Orc5l   |               | Origin Recognition Complex Subunit 5                                         |
| Osbp110 |               | Oxysterol Binding Protein Like 10                                            |
| Parm1   | 9130213B05Rik | Prostate Androgen-Regulated Mucin-Like Protein 1                             |
| Pcanap6 |               | Solute Carrier Family 45 Member 3                                            |
| Pcmt1   | A030012M09Rik | Protein-L-Isoaspartate (D-Aspartate) O-Methyltransferase Domain Containing 1 |
| Pcsk6   |               | Proprotein Convertase Subtilisin/Kexin Type 6                                |
| Pdgfa   |               | Platelet Derived Growth Factor Subunit A                                     |
| Pdzd4   |               | PDZ Domain Containing 4                                                      |
| Per2    |               | Period Circadian Clock 2                                                     |
| Pgpep1  |               | Pyroglutamyl-Peptidase I                                                     |
| Pink1   |               | PTEN Induced Putative Kinase 1                                               |
| Pip5k2a |               | Phosphatidylinositol-5-Phosphate 4-Kinase Type 2 Alpha                       |
| Pla2g5  |               | Phospholipase A2 Group V                                                     |
| Plekha1 |               | Pleckstrin Homology Domain Containing A1                                     |
| Plekha2 |               | Pleckstrin Homology Domain Containing A2                                     |
| Polr2h  |               | RNA Polymerase II Subunit H                                                  |
| Polr2l  |               | RNA Polymerase II Subunit L                                                  |
| Polr3f  |               | RNA Polymerase III Subunit F                                                 |
| Por     |               | Cytochrome P450 Oxidoreductase                                               |
| Por     |               | Porcupine Homolog (Drosophila)                                               |
| Pou6f1  |               | POU Class 6 Homeobox 1                                                       |
| Ppm1a   |               | Protein Phosphatase, Mg2+/Mn2+ Dependent 1A                                  |
| Ppt1    |               | Palmitoyl-Protein Thioesterase 1                                             |
| Prkar2b |               | Protein Kinase Camp-Dependent Type II Regulatory Subunit Beta                |
| Prlr    |               | Prolactin Receptor                                                           |
| Prlr    |               | Prolactin Receptor                                                           |
| Prss15  |               | Lon Peptidase 1, Mitochondrial                                               |
| Psm1    |               | Proteasome Subunit Alpha 1                                                   |
| Ptpro   |               | Protein Tyrosine Phosphatase, Receptor Type O                                |
| Ptpro   |               | Protein Tyrosine Phosphatase, Receptor Type U                                |
| Rad52b  |               | RAD52 Motif Containing 1                                                     |
| Rbbp7   |               | RB Binding Protein 7, Chromatin Remodeling Factor                            |
| Rcc2    |               | Regulator Of Chromosome Condensation 2                                       |
| Rcl1    |               | RNA Terminal Phosphate Cyclase Like 1                                        |
| Reep2   | BC020184      | Receptor Accessory Protein 2                                                 |
| Ren1    |               |                                                                              |
| Rgs11   |               | Regulator Of G-Protein Signaling 11                                          |

|           |               |                                                                                                   |
|-----------|---------------|---------------------------------------------------------------------------------------------------|
| Rhpn1     |               | Rhophilin Rho Gtpase Binding Protein 1                                                            |
| Rmdn2     |               | Regulator Of Microtubule Dynamics 2                                                               |
| Rnf138    |               | Ring Finger Protein 138                                                                           |
| Rnf181    | 2500002L14Rik | Ring Finger Protein 181                                                                           |
| Rnf213    | D11ErtD759e   | Ring Finger Protein 213                                                                           |
| Rnf34     |               | Ring Finger Protein 34                                                                            |
| Rnmt      |               | RNA Guanine-7 Methyltransferase                                                                   |
| Rpp30     |               | Ribonuclease P/MRP Subunit P30                                                                    |
| Rps27l    |               | Ribosomal Protein S27 Like                                                                        |
| Sc4mol    |               | Methylsterol Monooxygenase 1                                                                      |
| Scarb1    |               | Scavenger Receptor Class B Member 1                                                               |
| Schip1    |               | Schwannomin Interacting Protein 1                                                                 |
| Scrn2     |               | Secernin 2                                                                                        |
| Sct       |               | Secretin                                                                                          |
| Sec11l1   |               | SEC11 Homolog A, Signal Peptidase Complex Subunit                                                 |
| Senp8     |               | SUMO/Sentrin Peptidase Family Member, NEDD8 Specific                                              |
| Serpinb6a |               | Serine (Or Cysteine) Peptidase Inhibitor, Clade B, Member 6a                                      |
| Sgk3      |               | Serum/Glucocorticoid Regulated Kinase Family Member 3                                             |
| Sil1      |               | SIL1 Nucleotide Exchange Factor                                                                   |
| Slc16a1   |               | Solute Carrier Family 16 Member 1                                                                 |
| Slc20a1   |               | Solute Carrier Family 20 Member 1                                                                 |
| Slc25a31  |               | Solute Carrier Family 25 Member 31                                                                |
| Slc25a39  | D11ErtD333e   | Solute Carrier Family 25, Member 39                                                               |
| Slc29a1   |               | Solute Carrier Family 29 Member 1 (Augustine Blood Group)                                         |
| Slc38a1   |               | Solute Carrier Family 38 Member 1                                                                 |
| Slc44a1   |               | Solute Carrier Family 44 Member 1                                                                 |
| Slc7a5    |               | Solute Carrier Family 7 Member 5                                                                  |
| Smarca4   |               | SWI/SNF Related, Matrix Associated, Actin Dependent Regulator Of Chromatin, Subfamily A, Member 4 |
| Smoc1     |               | SPARC Related Modular Calcium Binding 1                                                           |
| Snrpn     |               | Small Nuclear Ribonucleoprotein Polypeptide N                                                     |
| Snw1      |               | SNW Domain Containing 1                                                                           |
| Sostdc1   |               | Sclerostin Domain Containing 1                                                                    |
| Sox2      |               | SRY-Box 2                                                                                         |
| Sox4      |               | SRY-Box 4                                                                                         |
| Spice1    | D16ErtD480e   | Spindle And Centriole Associated Protein 1                                                        |
| Srfbp1    |               | Serum Response Factor Binding Protein 1                                                           |
| Srpx2     |               | Sushi Repeat Containing Protein, X-Linked 2                                                       |
| Star      |               | Steroidogenic Acute Regulatory Protein                                                            |
| Star      |               | Guanylate Cyclase 2C                                                                              |
| Star      |               | Steroidogenic Acute Regulatory Protein                                                            |
| Stc1      |               | Stanniocalcin 1                                                                                   |
| Stc2      |               | Stanniocalcin 2                                                                                   |
| Stk25     |               | Serine/Threonine Kinase 25                                                                        |

|         |               |                                                                  |
|---------|---------------|------------------------------------------------------------------|
| Stxbp2  |               | Syntaxin Binding Protein 2                                       |
| Tacr3   |               | Tachykinin Receptor 3                                            |
| Tacstd1 |               | Epithelial Cell Adhesion Molecule                                |
| Taf7    |               | TATA-Box Binding Protein Associated Factor 7                     |
| Tbc1d8  |               | TBC1 Domain Family Member 8                                      |
| Tcf21   |               | Transcription Factor 21                                          |
| Tde1    |               | Serine Incorporator 3                                            |
| Tdrd12  | 2410004F06Rik | Tudor Domain Containing 12                                       |
| Tesc    |               | Tescalcin                                                        |
| Tex2    |               | Testis Expressed 2                                               |
| Tex261  |               | Testis Expressed 261                                             |
| Tgif    |               | TGFB Induced Factor Homeobox 1                                   |
| Timm8b  |               | Translocase Of Inner Mitochondrial Membrane 8 Homolog B          |
| Tle6    |               | Transducin Like Enhancer Of Split 6                              |
| Tmcc3   |               | Transmembrane And Coiled-Coil Domain Family 3                    |
| Tmem22  |               | Solute Carrier Family 35 Member G2                               |
| Tmem35  |               | Transmembrane Protein 35A                                        |
| Tmem64  | 9630015D15Rik | Transmembrane Protein 64                                         |
| Tmem86a | 1810054O13Rik | Transmembrane Protein 86A                                        |
| Tpd52   |               | Tumor Protein D52                                                |
| Tpr     |               | Translocated Promoter Region, Nuclear Basket Protein             |
| Trim71  |               | Tripartite Motif Containing 71                                   |
| Trip13  |               | Thyroid Hormone Receptor Interactor 13                           |
| Trpv2   |               | Transient Receptor Potential Cation Channel Subfamily V Member 2 |
| Ttrap   |               | Transformation/Transcription Domain Associated Protein           |
| Ttc39c  | 2810439F02Rik | Tetratricopeptide Repeat Domain 39C                              |
| Txnrd2  |               | Thioredoxin Reductase 2                                          |
| Tyro3   |               | TYRO3 Protein Tyrosine Kinase                                    |
| Ube2t   |               | Ubiquitin Conjugating Enzyme E2 T                                |
| Uchl1   |               | Ubiquitin C-Terminal Hydrolase L1                                |
| Uchl5   |               | Ubiquitin C-Terminal Hydrolase L5                                |
| Usf1    |               | Upstream Transcription Factor 1                                  |
| Utn     |               | Utrophin                                                         |
| Wdr10   |               | Intraflagellar Transport 122                                     |
| Wdr21   |               | DDB1 And CUL4 Associated Factor 4                                |
| Wdr31   |               | WD Repeat Domain 31                                              |
| Wdr36   |               | WD Repeat Domain 36                                              |
| Xrcc6   |               | X-Ray Repair Cross Complementing 6                               |
| Yars2   |               | Tyrosyl-Trna Synthetase 2                                        |
| Zdhhc24 |               | Zinc Finger DHHC-Type Containing 24                              |
| Zfp451  |               | Zinc Finger Protein 451                                          |
| Zfp516  |               | Zinc Finger Protein 516                                          |
