# Supplementary material
Source: publisher figshare collection journal article supplement (https://karger.figshare.com/articles/dataset/_/4649866)
Supplement: Supplementary file 5 [file 1]

|                                                                                                                                 |
|---------------------------------------------------------------------------------------------------------------------------------|
| <b>Table S4:</b><br><b>“Tissue Expression” feature in DAVID identifies 55 genes with expression annotated in in the testis.</b> |
| Anti-Mullerian Hormone(Amh)                                                                                                     |
| ADP-Ribosyltransferase 5(Art5)                                                                                                  |
| G Protein-Coupled Receptor Kinase 5(Grk5)                                                                                       |
| Glutathione S-Transferase, Mu 5(Gstm5)                                                                                          |
| Homeobox D9(Hoxd9)                                                                                                              |
| Hydroxysteroid (17-Beta) Dehydrogenase 7(Hsd17b7)                                                                               |
| Heat Shock Protein 2(Hspa2)                                                                                                     |
| Heat Shock Protein 90, Alpha (Cytosolic), Class A Member 1(Hsp90aa1)                                                            |
| Lyl Antibody Reactive Clone(Lyar)                                                                                               |
| Myeloblastosis Oncogene-Like 1(Mybl1)                                                                                           |
| Phospholipase A2, Group V(Pla2g5)                                                                                               |
| POU Domain, Class 6, Transcription Factor 1(Pou6f1)                                                                             |
| Prolactin Receptor(Prlr)                                                                                                        |
| Secretin(Sct)                                                                                                                   |
| Scavenger Receptor Class B, Member 1(Scarb1)                                                                                    |
| Steroidogenic Acute Regulatory Protein(Star)                                                                                    |
| Stanniocalcin 1(Stc1)                                                                                                           |
| Syntaxin Binding Protein 2(Stxbp2)                                                                                              |
| Testis Expressed Gene 2(Tex2)                                                                                                   |
| Testis Expressed Gene 261(Tex261)                                                                                               |
| Utrophin(Utrn)                                                                                                                  |
| Proteasome (Prosome, Macropain) Subunit, Alpha Type 1(Psma1)                                                                    |
| Serine Incorporator 3(Serinc3)                                                                                                  |
| Coatomer Protein Complex, Subunit Beta 2 (Beta Prime)(Copb2)                                                                    |
| Apoptosis Antagonizing Transcription Factor(Aatf)                                                                               |
| Ring Finger Protein 138(Rnf138)                                                                                                 |
| Sclerostin Domain Containing 1(Sostdc1)                                                                                         |
| Ring Finger Protein 181(Rnf181)                                                                                                 |
| RNA (Guanine-7-) Methyltransferase(Rnmt)                                                                                        |
| Solute Carrier Family 25, Member 39(Slc25a39)                                                                                   |
| PTEN Induced Putative Kinase 1(Pink1)                                                                                           |
| NADH Dehydrogenase (Ubiquinone) 1, Alpha/Beta Subcomplex, 1(Ndub1)                                                              |
| Bobby Sox Homolog (Drosophila)(Bbx)                                                                                             |
| Aldo-Keto Reductase Family 1, Member C-Like(Akr1c1)                                                                             |
| WD Repeat Domain 31(Wdr31)                                                                                                      |
| Solute Carrier Family 25 (Mitochondrial Carrier; Adenine Nucleotide Translocator), Member 31(Slc25a31)                          |

|                                                                    |
|--------------------------------------------------------------------|
| Kinesin Family Member 2C(Kif2c)                                    |
| Interferon Induced Transmembrane Protein 7(Iftm7)                  |
| Fatty Acid Desaturase 1(Fads1)                                     |
| Inner Membrane Protein, Mitochondrial(Immt)                        |
| Mitochondrial Translational Initiation Factor 2(Mtif2)             |
| Ring Finger Protein 34(Rnf34)                                      |
| Intraflagellar Transport 122(Ift122)                               |
| Lin-28 Homolog A (C. Elegans)(Lin28a)                              |
| Calmin(Clmn)                                                       |
| Zinc Finger Protein 451(Zfp451)                                    |
| Ets Variant 5(Etv5)                                                |
| Heat Shock Protein 1A(Hspa1a)                                      |
| Calcium/Calmodulin-Dependent Protein Kinase Kinase 2, Beta(Camkk2) |
| Centrosomal Protein 68(Cep68)                                      |
| Basic Transcription Factor 3(Btf3)                                 |
| General Transcription Factor IIB(Gtf2b)                            |
| GRAM Domain Containing 1B(Gramd1b)                                 |
| Lipase, Member H(Liph)                                             |
| Ring Finger Protein 213(Rnf213)                                    |
